# Supplementary material for: The impact of cellular senescence and senescence‑associated secretory phenotype in cancer‑associated fibroblasts on the malignancy of pancreatic cancer
Source: PubMed Central journal article supplement — Oncol Rep. 2023 Mar 27;49(5):98. doi: 10.3892/or.2023.8535 (PMC10091076; doi:10.3892/or.2023.8535), 2023-03-27
Supplement: Supplementary_Data2.pdf [file Supplementary_Data2.pdf]

Table SI. Clinical information for 8 patients before the initiation of treatment.

|    | Age | Sex    | Tumor location | Resectability | Tumor size (mm) | serum CA19-9 level (U/ml) | SUV max |
|----|-----|--------|----------------|---------------|-----------------|---------------------------|---------|
| #1 | 67  | Female | Ph             | BR            | 34.3            | 390.3                     | 14.1    |
| #2 | 59  | Female | Ph             | R             | 26.9            | 0.4                       | 9.8     |
| #3 | 55  | Male   | Pb             | R             | 23.4            | 177.1                     | 6.4     |
| #4 | 65  | Male   | Ph             | R             | 32.9            | 2530.6                    | 6.7     |
| #5 | 53  | Female | Pb             | R             | 9.5             | 0.4                       | 4.4     |
| #6 | 77  | Male   | Ph             | R             | 22.0            | 50.2                      | 3.8     |
| #7 | 72  | Female | Ph             | BR            | 17.9            | 481.1                     | 4.5     |
| #8 | 77  | Female | Ph             | BR            | 26.7            | 1304.5                    | 10.6    |

Ph, pancreatic head; Pb, pancreatic body; BR, borderline resectable; R, resectable; CA19-9, carbohydrate antigen 19-9.

Table SII. Detailed clinical information for six cases before and after neoadjuvant chemotherapy.

|    | Neoadjuvant therapy | Tumor size before neoadjuvant chemotherapy (mm) | Tumor size after neoadjuvant chemotherapy (mm) | Tumor size ratio | Evans Grade |
|----|---------------------|-------------------------------------------------|------------------------------------------------|------------------|-------------|
| #1 | GnP                 | 34.3                                            | 23.8                                           | 0.694            | II a        |
| #2 | GnP                 | 26.9                                            | 17.7                                           | 0.658            | II a        |
| #4 | GS                  | 32.9                                            | 23.6                                           | 0.717            | II a        |
| #6 | GS                  | 22.0                                            | 17.6                                           | 0.800            | II a        |
| #7 | GnP                 | 17.9                                            | 16.8                                           | 0.939            | I           |
| #8 | GnP                 | 26.7                                            | 24.8                                           | 0.929            | II a        |

GnP, gemcitabine plus nab-paclitaxel; GS, gemcitabine plus S-1. Tumor size ratio = (Tumor size after neoadjuvant chemotherapy)/(Tumor size before neoadjuvant chemotherapy).

Table SIII. Ranking of genes expressed by CAFs, for which the RNA level strongly correlates with PC cell proliferation in co-culture assays (all 162 genes).

|    | Gene   | R          | R <sup>2</sup> | P-value    | Category                      |
|----|--------|------------|----------------|------------|-------------------------------|
| 1  | MICB   | 0.93809528 | 0.88002276     | 0.00056588 | Antigen presentation          |
| 2  | ACKR3  | 0.91177175 | 0.83132772     | 0.00160536 | Chemokine Receptors           |
| 3  | TP53   | 0.85589685 | 0.73255941     | 0.00669579 | Senescence pathway            |
| 4  | HIF1A  | 0.85280849 | 0.72728232     | 0.00711819 | Transcription factors         |
| 5  | IL1B   | 0.85013216 | 0.72272469     | 0.00749769 | Interleukins                  |
| 6  | IL6    | 0.84553845 | 0.71493526     | 0.00817868 | Interleukins                  |
| 7  | NFKB1  | 0.83867626 | 0.70337786     | 0.00926727 | Transcription factors         |
| 8  | MYC    | 0.83630634 | 0.6994083      | 0.0096635  | p53 signaling                 |
| 9  | CDKN2C | 0.83025102 | 0.68931675     | 0.01072423 | p53 signaling                 |
| 10 | IL15   | 0.82956877 | 0.68818435     | 0.01084816 | Interleukins                  |
| 11 | GLB1   | 0.82418807 | 0.67928597     | 0.01185738 | Senescence response genes     |
| 12 | CXCL12 | 0.82326029 | 0.67775751     | 0.01203716 | Chemokines                    |
| 13 | SPP1   | 0.8116443  | 0.65876646     | 0.01443503 | Cytokines                     |
| 14 | MIF    | 0.80859887 | 0.65383213     | 0.01510959 | Immunosuppressive factors     |
| 15 | PLAU   | 0.80833026 | 0.65339781     | 0.01517002 | p53 signaling                 |
| 16 | CDKN2A | 0.80213546 | 0.64342129     | 0.016606   | Senescence pathway            |
| 17 | HLA-A  | 0.79876429 | 0.63802439     | 0.01742193 | Antigen presentation          |
| 18 | ATM    | 0.77915049 | 0.60707548     | 0.02266605 | Senescence pathway            |
| 19 | CDKN2D | 0.77733289 | 0.60424643     | 0.02319601 | Senescence pathway            |
| 20 | PCNA   | 0.77189716 | 0.59582523     | 0.02482654 | DNA Damage & repair           |
| 21 | COL1A1 | 0.77171915 | 0.59555045     | 0.0248811  | Cell adhesion molecules       |
| 22 | KITLG  | 0.77157043 | 0.59532093     | 0.02492674 | Cytokines                     |
| 23 | IGFBP7 | 0.76868641 | 0.59087879     | 0.02582207 | Insulin growth factor related |
| 24 | COL3A1 | 0.76772351 | 0.58939939     | 0.02612535 | Cell adhesion molecules       |
| 25 | CREG1  | 0.75763135 | 0.57400526     | 0.02943698 | p53 signaling                 |
| 26 | STAT3  | 0.7573919  | 0.57364249     | 0.02951852 | Transcription factors         |
| 27 | CDKN1A | 0.75092162 | 0.56388328     | 0.03177478 | Senescence pathway            |
| 28 | FN1    | 0.74839941 | 0.56010168     | 0.03268208 | Cytoskeleton regulators       |
| 29 | TGFB1  | 0.74411056 | 0.55370053     | 0.03426099 | Growth factors & receptors    |
| 30 | BCL2L1 | 0.74306419 | 0.55214439     | 0.03465314 | Anti-apoptotic                |
| 31 | CCNB1  | 0.74150515 | 0.54982989     | 0.03524249 | p53 signaling                 |

|    |         |             |            |            |                               |
|----|---------|-------------|------------|------------|-------------------------------|
| 32 | TNFSF10 | 0.74007056  | 0.54770443 | 0.03579018 | Interferon-responsive genes   |
| 33 | IGF1    | 0.73434132  | 0.53925717 | 0.03802911 | Insulin growth factor related |
| 34 | NOX4    | 0.72532687  | 0.52609907 | 0.04172081 | Oxidative stress              |
| 35 | TLR4    | 0.7245056   | 0.52490837 | 0.0420675  | Toll-Like receptor signaling  |
| 36 | HLA-B   | 0.72432847  | 0.52465173 | 0.04214251 | Antigen presentation          |
| 37 | RBL2    | 0.71391034  | 0.50966798 | 0.04669726 | Senescence pathway            |
| 38 | TP53BP1 | 0.71126184  | 0.5058934  | 0.04790043 | DNA damage & repair           |
| 39 | MAPK14  | 0.70378978  | 0.49532006 | 0.05139472 | MAP kinase signaling          |
| 40 | CCR10   | 0.70080073  | 0.49112167 | 0.0528341  | Chemokine receptors           |
| 41 | MICA    | 0.69721479  | 0.48610846 | 0.05459246 | Antigen presentation          |
| 42 | ID1     | 0.69210519  | 0.4790096  | 0.05715767 | p53 signaling                 |
| 43 | VEGFA   | 0.68950703  | 0.47541995 | 0.0584891  | Immunosuppressive factors     |
| 44 | CCL20   | 0.6893705   | 0.47523168 | 0.05855957 | Chemokines                    |
| 45 | CDKN2B  | 0.68904428  | 0.47478202 | 0.05872816 | p53 signaling                 |
| 46 | IL12B   | 0.68863157  | 0.47421344 | 0.05894185 | Interleukins                  |
| 47 | CCL2    | 0.67912863  | 0.4612157  | 0.06399073 | Chemokines                    |
| 48 | MAP2K1  | 0.67797317  | 0.45964763 | 0.06462146 | MAP kinase signaling          |
| 49 | CDKN1C  | 0.67402474  | 0.45430935 | 0.06680454 | p53 signaling                 |
| 50 | EGFR    | 0.67333269  | 0.45337692 | 0.06719159 | Growth factors and receptors  |
| 51 | PTEN    | 0.67163167  | 0.4510891  | 0.06814857 | Senescence response genes     |
| 52 | GBP1    | 0.66830697  | 0.44663421 | 0.07004214 | Interferon signaling          |
| 53 | SOD2    | 0.66742757  | 0.44545957 | 0.07054812 | Oxidative stress              |
| 54 | IL4     | -0.66109463 | 0.43704611 | 0.0742554  | Interleukins                  |
| 55 | IRF1    | 0.66038941  | 0.43611417 | 0.07467515 | Interferon signaling          |
| 56 | BMI1    | 0.62595017  | 0.39181361 | 0.09687772 | Senescence pathway            |
| 57 | IL10    | 0.6224199   | 0.38740653 | 0.09934392 | Interleukins                  |
| 58 | GADD45A | 0.61723754  | 0.38098218 | 0.10302883 | DNA damage and repair         |
| 59 | TNF     | 0.61452294  | 0.37763844 | 0.10498975 | Immunostimulatory factors     |
| 60 | FASLG   | 0.60935329  | 0.37131143 | 0.10878256 | Pro-apoptotic                 |
| 61 | CXCL10  | 0.60498053  | 0.36600144 | 0.11205066 | Chemokines                    |
| 62 | MAP2K6  | 0.60244782  | 0.36294338 | 0.1139687  | MAP kinase signaling          |
| 63 | SOD1    | 0.59702252  | 0.35643589 | 0.11813948 | Oxidative stress              |
| 64 | IGFBP3  | 0.58957398  | 0.34759747 | 0.12400382 | Insulin growth factor related |
| 65 | TWIST1  | 0.58580691  | 0.34316973 | 0.12703062 | Senescence pathway            |

|    |          |             |            |            |                              |
|----|----------|-------------|------------|------------|------------------------------|
| 66 | ETS2     | 0.58415279  | 0.34123448 | 0.12837262 | Senescence pathway           |
| 67 | CDK4     | 0.56173141  | 0.31554218 | 0.14734236 | Senescence pathway           |
| 68 | SPARC    | 0.55818718  | 0.31157292 | 0.15047374 | p53 signaling                |
| 69 | CCNE1    | 0.55570057  | 0.30880312 | 0.1526923  | Senescence pathway           |
| 70 | CCR7     | 0.55458455  | 0.30756402 | 0.15369381 | Chemokine receptors          |
| 71 | IL12A    | 0.5539694   | 0.30688209 | 0.15424738 | Interleukins                 |
| 72 | TLR3     | 0.54702708  | 0.29923862 | 0.1605702  | Toll-Like receptor signaling |
| 73 | NBN      | 0.54273575  | 0.29456209 | 0.1645479  | DNA damage and repair        |
| 74 | CDKN1B   | 0.5361217   | 0.28742648 | 0.1707821  | Interferon signaling         |
| 75 | CALR     | 0.53105176  | 0.28201598 | 0.17564574 | p21 effectors                |
| 76 | PTGS2    | 0.52579575  | 0.27646117 | 0.18076549 | Immunosuppressive factors    |
| 77 | SERPINE1 | 0.51116567  | 0.26129034 | 0.1954307  | p53 signaling                |
| 78 | ALDH1A3  | 0.5083239   | 0.25839319 | 0.19834975 | p53 signaling                |
| 79 | STAT1    | 0.50681264  | 0.25685905 | 0.19991141 | Transcription factors        |
| 80 | MDM2     | 0.50628791  | 0.25632745 | 0.20045514 | Senescence pathway           |
| 81 | MYD88    | 0.50411947  | 0.25413644 | 0.20271038 | Toll-Like receptor signaling |
| 82 | RBL1     | -0.49314587 | 0.24319285 | 0.21432617 | p53 signaling                |
| 83 | CDC25C   | 0.49012405  | 0.24022158 | 0.21758414 | p53 signaling                |
| 84 | PRKCD    | 0.4789186   | 0.22936302 | 0.2298874  | Oxidative stress             |
| 85 | CHEK1    | 0.47792432  | 0.22841165 | 0.23099593 | Senescence pathway           |
| 86 | EGF      | -0.47235615 | 0.22312033 | 0.23725436 | Growth factors and receptors |
| 87 | AKT1     | 0.46863162  | 0.2196156  | 0.24148826 | p53 signaling                |
| 88 | VIM      | 0.46272886  | 0.214118   | 0.24827616 | Cytoskeleton regulators      |
| 89 | CCL18    | 0.45778996  | 0.20957165 | 0.25402872 | Chemokines                   |
| 90 | CXCL8    | 0.44980542  | 0.20232492 | 0.26346853 | Chemokines                   |
| 91 | MAP2K3   | 0.44236437  | 0.19568623 | 0.27242027 | MAP kinase signaling         |
| 92 | TBX2     | 0.44234428  | 0.19566846 | 0.27244463 | p16 effectors                |
| 93 | ABL1     | 0.44110336  | 0.19457218 | 0.27395196 | p53 signaling                |
| 94 | CXCR4    | 0.44104707  | 0.19452252 | 0.27402043 | Chemokine receptors          |
| 95 | MORC3    | 0.43696476  | 0.1909382  | 0.27900869 | p53 signaling                |
| 96 | RB1      | 0.43106253  | 0.1858149  | 0.2862988  | Senescence pathway           |
| 97 | CXCL2    | 0.4269243   | 0.18226436 | 0.29146483 | Chemokines                   |
| 98 | IL23A    | 0.42144107  | 0.17761257 | 0.29837896 | Interleukins                 |
| 99 | CCR1     | 0.42002477  | 0.17642081 | 0.30017757 | Chemokine Receptors          |

|     |          |             |            |            |                                      |
|-----|----------|-------------|------------|------------|--------------------------------------|
| 100 | GZMA     | 0.41906823  | 0.17561818 | 0.30139527 | Enzymatic modulators of inflammation |
| 101 | IL1A     | 0.41831095  | 0.17498405 | 0.30236098 | Interleukins                         |
| 102 | CD44     | 0.40476661  | 0.16383601 | 0.31988248 | Cell adhesion molecules              |
| 103 | CCND1    | 0.40111298  | 0.16089162 | 0.32468909 | Senescence pathway                   |
| 104 | IDO1     | 0.39837711  | 0.15870432 | 0.3283104  | Immunosuppressive factors            |
| 105 | CXCL5    | 0.39712384  | 0.15770734 | 0.32997557 | Chemokines                           |
| 106 | IRF3     | 0.3956777   | 0.15656084 | 0.33190189 | Interferon signaling                 |
| 107 | CCR2     | -0.39306613 | 0.15450098 | 0.33539387 | Chemokine receptors                  |
| 108 | IGF1R    | 0.39257467  | 0.15411487 | 0.33605292 | Insulin growth factor related        |
| 109 | CCNA2    | 0.39171155  | 0.15343794 | 0.33721181 | p53 signaling                        |
| 110 | FOXP3    | 0.39118412  | 0.15302501 | 0.33792089 | Transcription factors                |
| 111 | IGFBP5   | 0.38898477  | 0.15130915 | 0.34088516 | Insulin growth factor related        |
| 112 | NOS2     | 0.36911187  | 0.13624357 | 0.3682073  | Immunosuppressive factors            |
| 113 | EGR1     | -0.36868659 | 0.1359298  | 0.36880244 | Interferon signaling                 |
| 114 | TERF2    | 0.36862306  | 0.13588296 | 0.36889138 | DNA damage and repair                |
| 115 | CCR9     | 0.36617833  | 0.13408657 | 0.37232128 | Chemokine receptors                  |
| 116 | CXCR5    | -0.36350645 | 0.13213694 | 0.37608611 | Chemokine receptors                  |
| 117 | E2F3     | 0.3479858   | 0.12109411 | 0.39828688 | Senescence pathway                   |
| 118 | PIK3CA   | 0.34750941  | 0.12076279 | 0.39897712 | p53 signaling                        |
| 119 | CCR4     | -0.34618984 | 0.1198474  | 0.40089182 | Chemokine receptors                  |
| 120 | THBS1    | 0.34001546  | 0.11561052 | 0.40990349 | Cell adhesion molecules              |
| 121 | CSF3     | 0.33107441  | 0.10961027 | 0.4231053  | Growth factors and receptors         |
| 122 | ING1     | 0.32862278  | 0.10799293 | 0.42675625 | p53 signaling                        |
| 123 | CXCR3    | -0.32284465 | 0.10422867 | 0.43541314 | Chemokine receptors                  |
| 124 | CDK6     | 0.32090986  | 0.10298314 | 0.4383281  | Senescence pathway                   |
| 125 | CXCL9    | 0.31934008  | 0.10197809 | 0.44069909 | Chemokines                           |
| 126 | GSK3B    | 0.31734128  | 0.10070549 | 0.44372573 | p53 signaling                        |
| 127 | CTLA4    | -0.3126477  | 0.09774858 | 0.45086642 | Immunosuppressive factors            |
| 128 | CITED2   | 0.30404544  | 0.09244363 | 0.46407425 | p53 signaling                        |
| 129 | TERT     | -0.29257407 | 0.08559958 | 0.48192498 | DNA damage and repair                |
| 130 | CXCL11   | 0.28920772  | 0.0836411  | 0.48721388 | Chemokines                           |
| 131 | SERPINB2 | -0.28263296 | 0.07988139 | 0.49760829 | p53 signaling                        |
| 132 | TBX3     | 0.27977451  | 0.07827378 | 0.50215376 | p16 effectors                        |

|     |         |             |            |            |                                      |
|-----|---------|-------------|------------|------------|--------------------------------------|
| 133 | SIRT1   | 0.25255784  | 0.06378546 | 0.54620561 | p53 signaling                        |
| 134 | CD274   | -0.24263874 | 0.05887356 | 0.56259324 | Immunosuppressive factors            |
| 135 | CCL28   | 0.22958059  | 0.05270725 | 0.58442293 | Chemokines                           |
| 136 | CCL21   | -0.22842718 | 0.05217898 | 0.58636468 | Chemokines                           |
| 137 | TLR2    | -0.19800387 | 0.03920553 | 0.63833218 | Toll-Like receptor signaling         |
| 138 | PDCD1   | -0.19763845 | 0.03906096 | 0.63896475 | Immunosuppressive factors            |
| 139 | CXCR1   | 0.19535818  | 0.03816482 | 0.64291647 | Chemokine receptors                  |
| 140 | E2F1    | -0.19403257 | 0.03764864 | 0.64521712 | Senescence pathway                   |
| 141 | BCL2    | 0.19294963  | 0.03722956 | 0.64709845 | Anti-apoptotic                       |
| 142 | CCL22   | 0.18259916  | 0.03334245 | 0.66516083 | Chemokines                           |
| 143 | CCL4    | -0.17667725 | 0.03121485 | 0.6755593  | Chemokines                           |
| 144 | IRF7    | -0.15778105 | 0.02489486 | 0.70903378 | Interferon signaling                 |
| 145 | ETS1    | 0.15650334  | 0.02449329 | 0.71131264 | Senescence pathway                   |
| 146 | IL17A   | 0.15412374  | 0.02375413 | 0.71556172 | Interleukins                         |
| 147 | HRAS    | 0.14477158  | 0.02095881 | 0.73232224 | p53 effectors                        |
| 148 | CDK2    | 0.14180153  | 0.02010767 | 0.73766475 | Senescence pathway                   |
| 149 | CXCL1   | 0.13900816  | 0.01932327 | 0.74269785 | Chemokines                           |
| 150 | CXCR2   | -0.12929244 | 0.01671654 | 0.76026477 | Chemokine receptors                  |
| 151 | IL13    | 0.11855714  | 0.01405579 | 0.77977961 | Interleukins                         |
| 152 | IFNG    | 0.11749042  | 0.013804   | 0.78172436 | Interferon signaling                 |
| 153 | IL2     | 0.11607098  | 0.01347247 | 0.78431372 | Interleukins                         |
| 154 | HLA-C   | -0.10577277 | 0.01118788 | 0.80315031 | Antigen presentation                 |
| 155 | TGFB111 | 0.09920791  | 0.00984221 | 0.8152021  | Cell adhesion molecules              |
| 156 | CHEK2   | -0.09762836 | 0.0095313  | 0.81810666 | Senescence pathway                   |
| 157 | CCL5    | 0.08902914  | 0.00792619 | 0.83395034 | Chemokines                           |
| 158 | CSF2    | -0.08219872 | 0.00675663 | 0.84657022 | Growth factors and receptors         |
| 159 | CSF1    | 0.07237686  | 0.00523841 | 0.86476658 | Growth factors and receptors         |
| 160 | IRF5    | -0.05763252 | 0.00332151 | 0.89217807 | Interferon signaling                 |
| 161 | AICDA   | 0.01650579  | 0.00027244 | 0.96905727 | Enzymatic modulators of immunity     |
| 162 | GZMB    | 0.00307045  | 9.4277E-06 | 0.99424293 | Enzymatic modulators of inflammation |
